# Supplementary material for: The combination of CUDC-907 and gilteritinib shows promising in vitro and in vivo antileukemic activity against FLT3-ITD AML
Source: PubMed Central journal article supplement (PMC8184771; doi:10.1038/s41408-021-00502-7), 2021-06-07
Supplement: 41408_2021_502_MOESM1_ESM.pdf [file 41408_2021_502_MOESM1_ESM.pdf]

Figure S1

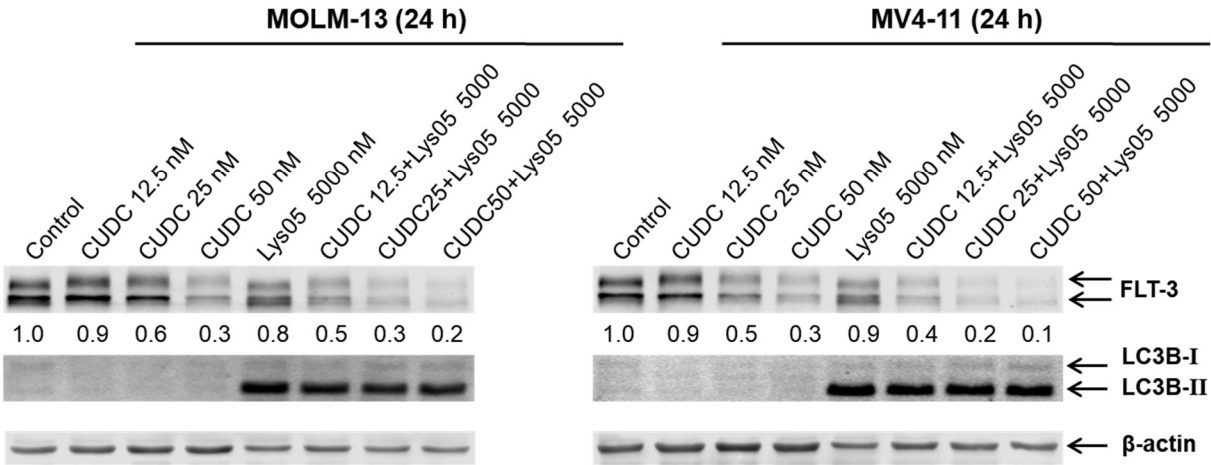

**Figure S1. The lysosome inhibitor Lys05 fails to rescue FLT3 protein from CUDC-907 treatment in FLT3-ITD AML cell lines.** MOLM-13 and MV4-11 cells were treated with vehicle control, varying concentrations of CUDC-907, or in combination with Lys05 for 24 h. Whole cell lysates were subjected to western blotting analysis. Densitometry was assessed via comparison to vehicle control and normalized to β-actin.

Figure S2

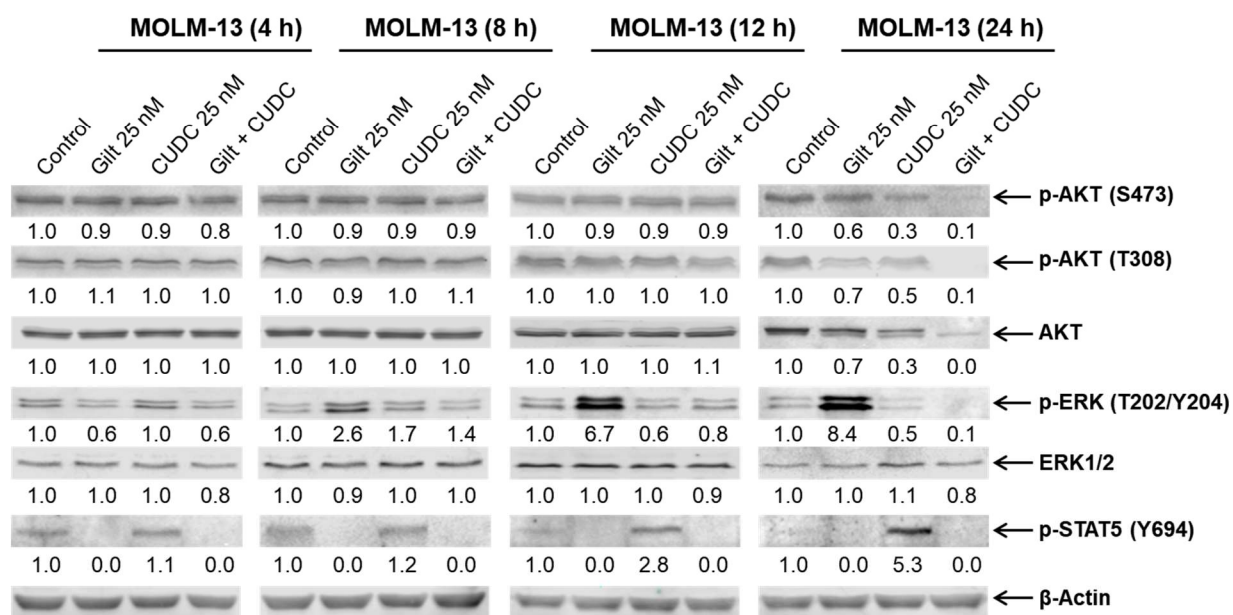

**Figure S2. CUDC-907 and gilteritinib induce complimentary and cooperatively altered activity within the MAPK/ERK and JAK/STAT pathways.** MOLM-13 cells were treated with gilteritinib, CUDC-907, both, or neither for 4, 8, 12, or 24 hours. Western blots were generated utilizing whole cell lysates, with representative blots shown, and densitometry displayed below each blot. Densitometry was assessed via comparison to vehicle control and normalized to  $\beta$ -actin.

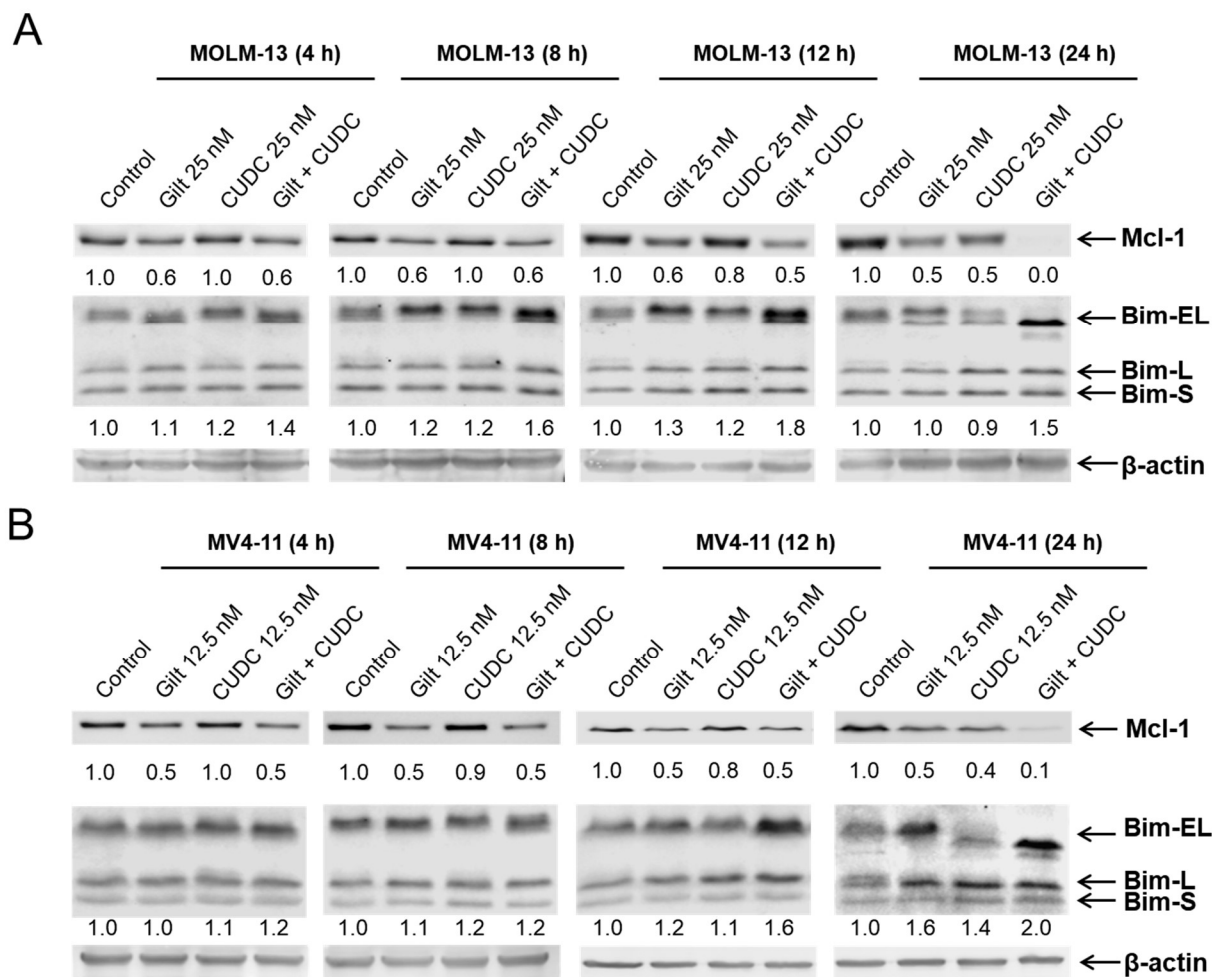

**Figure S3. Time-dependent downregulation of Mcl-1 and concurrent upregulation of Bim by CUDC-907 and gilteritinib.** MOLM-13 (panel A) and MV4-11 (panel B) cells were treated with gilteritinib, CUDC-907, both, or neither for 4, 8, 12, or 24 hours. Western blotting analysis was performed to assess Mcl-1 and Bim protein levels. Densitometry measurements, normalized to  $\beta$ -actin and relative to control, are shown below the corresponding blot.

**Figures S4-S8. CUDC-907 and gilteritinib treatment cooperatively decreases TCA cycle metabolites, amino acids, urea, nucleotides, and carnitines.** MV4-11 cells were treated with gilteritinib and/or CUDC-907 for 8 hours, at concentrations of 12.5 nM. Cells were collected, washed with PBS, and cell pellets were stored at -80°C. Metabolites were quantitatively profiled using LC-MS/MS based targeted metabolomics platform in the Karmanos Cancer Institute Pharmacology Core. Data analysis was performed using [www.MetaboAnalyst.ca](http://www.MetaboAnalyst.ca), version 4.0. Amino acids (Figure S4), carnitines (Figure S5), TCA cycle metabolites (Figure S6), nucleotides (Figure S7), and urea (Figure S8) were significantly downregulated in the combined gilteritinib and CUDC-907 treatment compared to vehicle control and single drug treatment. \*indicates  $p < 0.05$  compared to control and #indicates  $p < 0.05$  compared to control, CUDC-907, and gilteritinib.

**Figure S4**

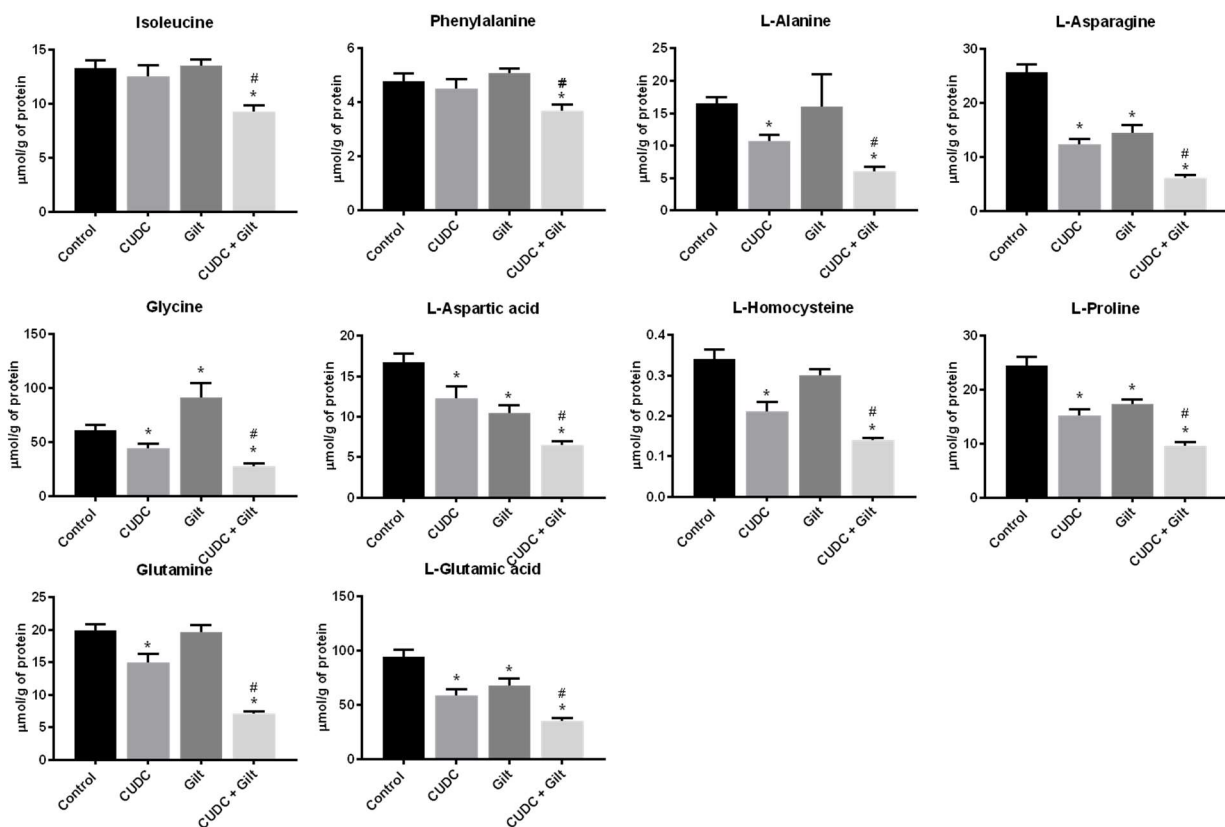

# Figure S5

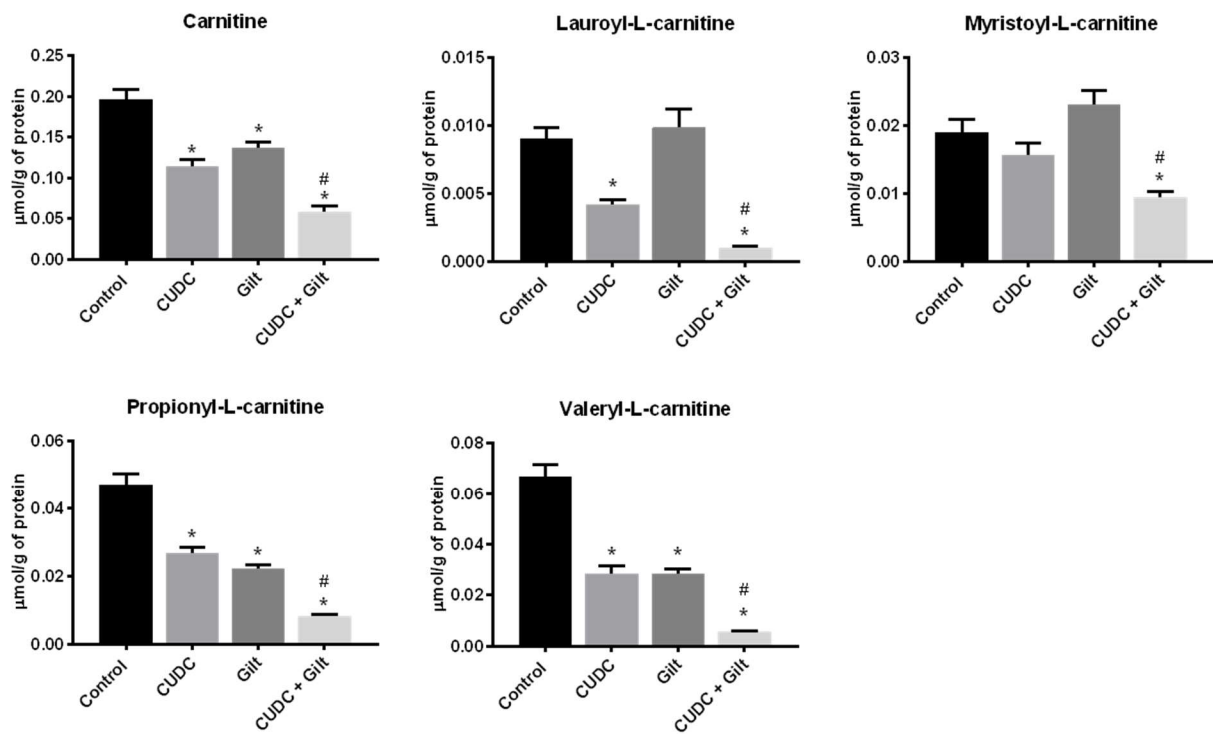

# Figure S6

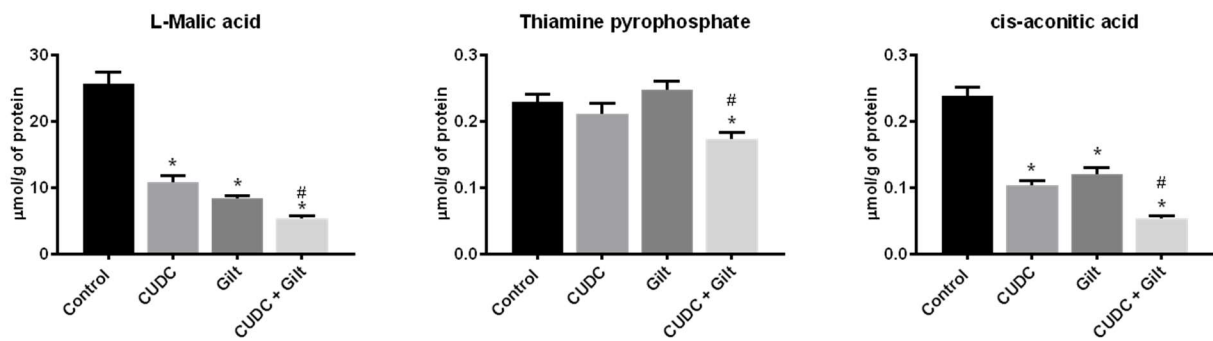

# Figure S7

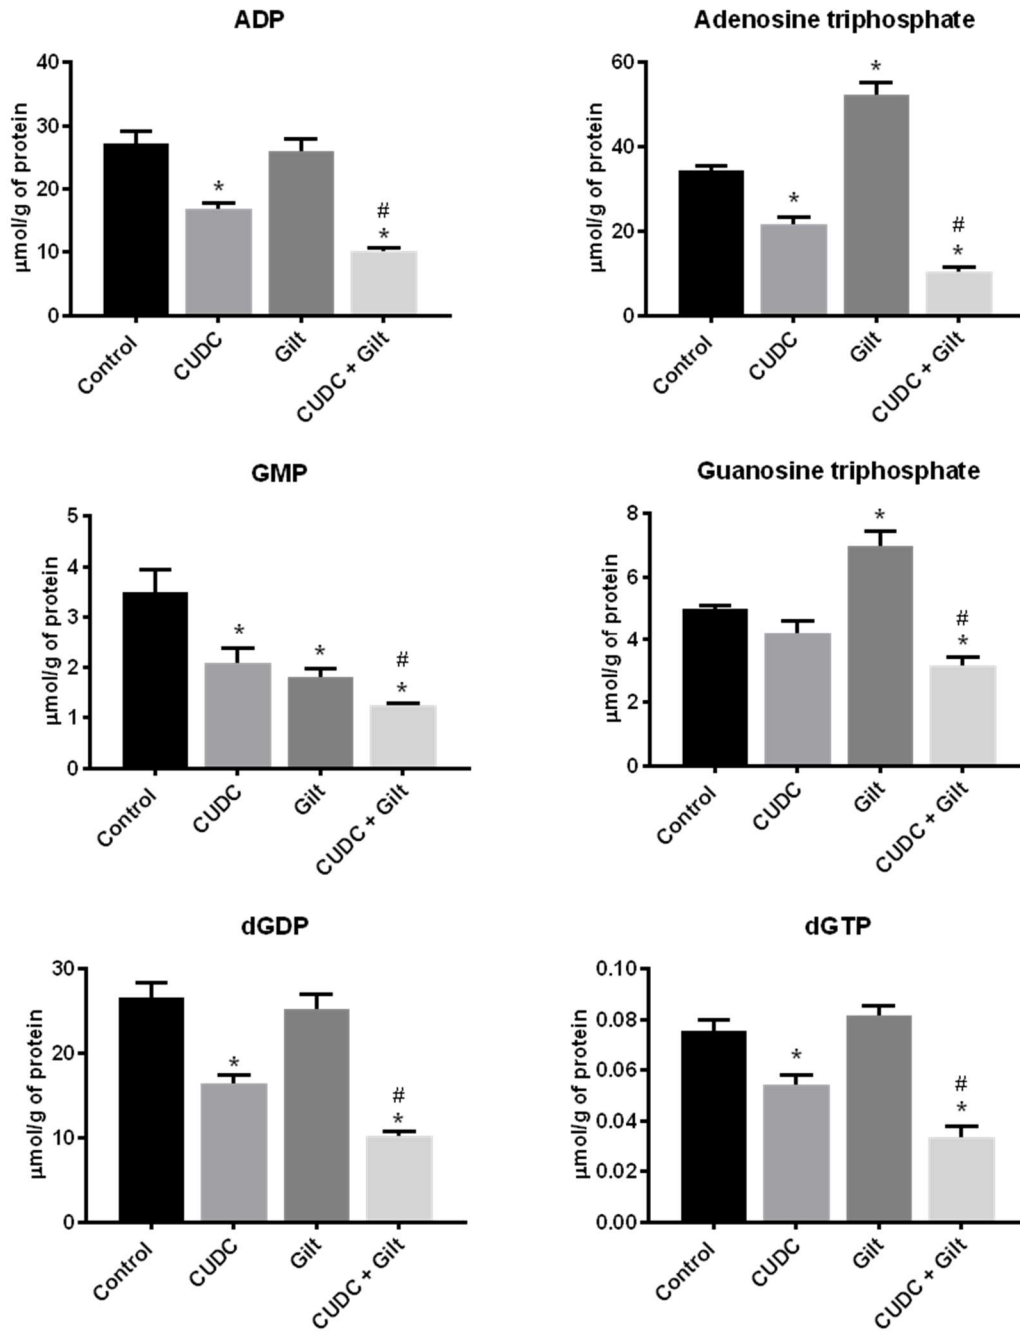

Figure S8

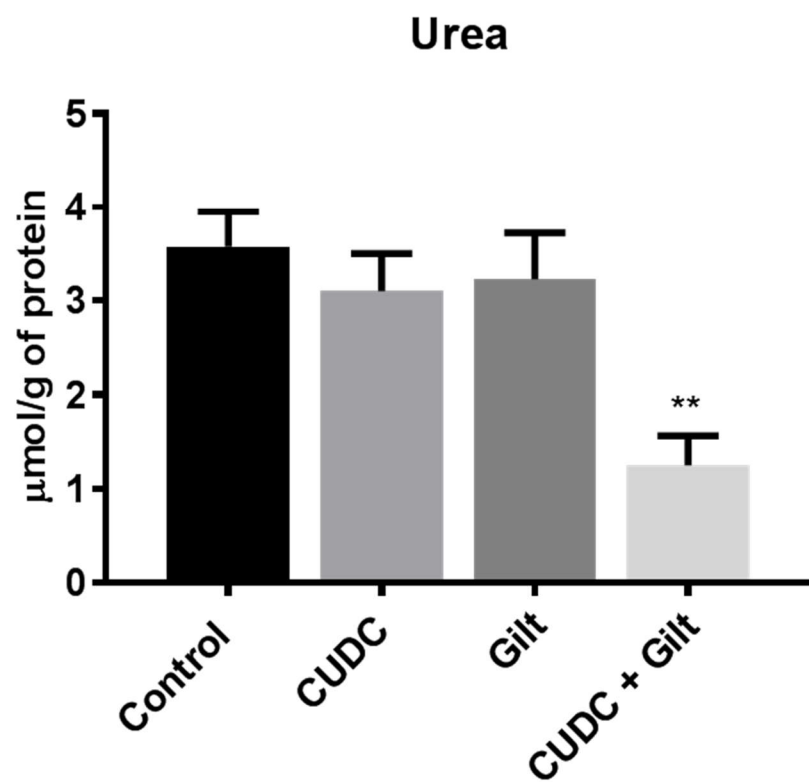

**Table S1. Patient characteristics of primary AML patient samples**

| Patients | Gender | Age (year) | Disease status  | FAB subtype | Cytogenetics                | Blast purity (%) | Gene mutation                                |
|----------|--------|------------|-----------------|-------------|-----------------------------|------------------|----------------------------------------------|
| AML#170  | Female | 50         | newly diagnosed | M4          | 46, XX, t(3; 3)(q21; q26)   | 72.0             | SF3B1                                        |
| AML#180  | Male   | 68         | Relapsed        | M5          | 46, XY                      | 96.5             | FLT3-ITD, NPM1, DNMT3A                       |
| AML#207  | Female | 66         | Newly diagnosed | M3          | 46, XX, t(15; 17)(q24; q21) | 92.0             | FLT3-ITD, PML-RAR $\alpha$                   |
| AML#208  | Female | 54         | Newly diagnosed | M2          | 46, XX                      | 88.0             | FIT3-ITD, IDH2, NPM1, TP53, ZRSR2            |
| AML#210  | Female | 1          | Newly diagnosed | M4/5        | 46, XX, t(1; 11)(q21; q23)  | 80.5             |                                              |
| AML#212  | Male   | 11         | Newly diagnosed | M2          | NA                          | 63.0             | FLT3-ITD                                     |
| AML#213  | Male   | 3          | Newly diagnosed | M4/5        | 46, XY                      | 64.0             | FLT3-ITD                                     |
| AML#214  | Male   | 8          | Newly diagnosed | M2          | 46, XY                      | 86.5             | FLT3-ITD                                     |
| AML#216  | Female | 14         | Newly diagnosed | M2          | 46, XX                      | 96.5             | GATA2, NPM1                                  |
| AML#235  | Female | 33         | Newly diagnosed | M4/5        | 46, XX                      | 87.0             | NPM1                                         |
| AML#254  | Female | 15         | Newly diagnosed | M5          | 46, XX                      | 78.0             | MLL-AF9, KMT2A, NF1                          |
| AML#256  | Male   | 57         | Newly diagnosed | M4/5        | 47, XY,+8                   | 80.5             | MLL-PTD, DNMT3A, SH2B3, FLT3-TKD, TCF, RUNX1 |
| AML#257  | Female | 53         | Newly diagnosed | M4/5        | 46, XX                      | 94.5             | FLT3-ITD, NPM1, TET2                         |



| Name                               | f.value | p.value  | -log10(p) | FDR         |
|------------------------------------|---------|----------|-----------|-------------|
| Valeryl-L-carnitine                | 208.13  | 5.01E-13 | 12.3      | 8.0705E-11  |
| Pantothenic acid                   | 190     | 1.02E-12 | 11.992    | 8.2004E-11  |
| Citicoline                         | 144.03  | 8.68E-12 | 11.061    | 3.4951E-10  |
| 2-Ketohexanoic acid                | 134.47  | 1.47E-11 | 10.832    | 4.4615E-10  |
| Propionyl-L-carnitine              | 132.35  | 1.66E-11 | 10.779    | 4.4615E-10  |
| Uridine triphosphate               | 98.711  | 1.55E-10 | 9.8083    | 3.1289E-09  |
| Lauroyl-L-carnitine                | 95.74   | 1.96E-10 | 9.708     | 3.5042E-09  |
| Taurine                            | 89.709  | 3.2E-10  | 9.4949    | 5.1514E-09  |
| Cytidine triphosphate              | 86.422  | 4.24E-10 | 9.373     | 6.2001E-09  |
| Adenosine triphosphate             | 84.604  | 4.97E-10 | 9.3037    | 6.284E-09   |
| L-Malic acid                       | 84.368  | 5.07E-10 | 9.2946    | 6.284E-09   |
| Dihydroxyacetone phosphate         | 81.621  | 6.5E-10  | 9.187     | 7.4768E-09  |
| cis-aconitic acid                  | 72.176  | 1.63E-09 | 8.789     | 1.7447E-08  |
| 4-Hydroxyproline                   | 67.716  | 2.61E-09 | 8.584     | 2.48E-08    |
| UDP                                | 66.855  | 2.86E-09 | 8.5429    | 2.5622E-08  |
| uridine diphosphate glucose        | 63.602  | 4.14E-09 | 8.3834    | 3.3293E-08  |
| Glutamine                          | 62.92   | 4.48E-09 | 8.3491    | 3.4318E-08  |
| Cystathionine                      | 61.506  | 5.29E-09 | 8.2767    | 3.8701E-08  |
| N-Acetyl-L-aspartic acid           | 60.455  | 6E-09    | 8.2219    | 4.1998E-08  |
| L-Asparagine                       | 58.572  | 7.56E-09 | 8.1215    | 5.0712E-08  |
| Adenosine diphosphate ribose       | 57.578  | 8.56E-09 | 8.0673    | 5.5153E-08  |
| Gluconic acid                      | 55.405  | 1.13E-08 | 7.9458    | 7.0151E-08  |
| Glutathione                        | 53.208  | 1.52E-08 | 7.8185    | 9.0566E-08  |
| ADP                                | 49.387  | 2.6E-08  | 7.5853    | 1.4424E-07  |
| dGDP                               | 48.385  | 3.01E-08 | 7.5215    | 1.615E-07   |
| Carnitine                          | 46.584  | 3.95E-08 | 7.4037    | 1.9858E-07  |
| CDP                                | 42.438  | 7.65E-08 | 7.1165    | 3.621E-07   |
| Folic acid                         | 41.977  | 8.26E-08 | 7.0831    | 3.7993E-07  |
| Thiamine                           | 41.294  | 9.27E-08 | 7.0329    | 4.0338E-07  |
| N-Methyl-D-aspartic acid           | 40.509  | 1.06E-07 | 6.9743    | 4.4948E-07  |
| Amino adipic acid                  | 39.287  | 1.31E-07 | 6.8811    | 5.2925E-07  |
| Pyridoxamine                       | 37.059  | 1.97E-07 | 6.7045    | 7.5696E-07  |
| NADP                               | 35.417  | 2.7E-07  | 6.5684    | 9.6651E-07  |
| Phosphorylcholine                  | 34.317  | 3.36E-07 | 6.4741    | 1.1748E-06  |
| Nicotinamide                       | 33.781  | 3.74E-07 | 6.4272    | 1.2808E-06  |
| N-Acetylglutamine                  | 33.642  | 3.85E-07 | 6.415     | 1.2901E-06  |
| Argininosuccinic acid              | 33.247  | 4.17E-07 | 6.3799    | 0.00000137  |
| L-Homocysteine                     | 32.185  | 5.2E-07  | 6.2838    | 1.6752E-06  |
| L-Proline                          | 31.643  | 5.84E-07 | 6.2336    | 1.8274E-06  |
| Picolinic acid                     | 31.55   | 5.96E-07 | 6.225     | 1.8274E-06  |
| Creatine                           | 29.224  | 9.98E-07 | 6.0009    | 2.9756E-06  |
| dGTP                               | 25.624  | 2.38E-06 | 5.6226    | 6.7345E-06  |
| Glycine                            | 24.826  | 2.93E-06 | 5.533     | 0.000008135 |
| NAD                                | 24.203  | 3.46E-06 | 5.4613    | 9.4326E-06  |
| L-Glutamic acid                    | 22.691  | 5.24E-06 | 5.281     | 0.00001405  |
| Guanosine triphosphate             | 21.669  | 7.02E-06 | 5.1536    | 0.000018232 |
| D-Sedoheptulose 7-phosphate        | 8.9794  | 0.001015 | 2.9938    | 0.0018352   |
| N-Acetylglutamic acid              | 21.131  | 8.23E-06 | 5.0846    | 0.000021031 |
| L-Aspartic acid                    | 18.461  | 1.9E-05  | 4.7205    | 0.000047145 |
| beta-nicotinamide D-ribonucleotide | 17.784  | 2.39E-05 | 4.6219    | 0.000058265 |
| GMP                                | 17.082  | 3.04E-05 | 4.5165    | 0.000072076 |
| Myristoyl-L-carnitine              | 16.593  | 3.62E-05 | 4.4411    | 0.000080987 |
| Malonyl CoA                        | 16.345  | 3.96E-05 | 4.4023    | 0.000087344 |
| 6-phosphogluconate                 | 14.238  | 8.84E-05 | 4.0537    | 0.00018745  |
| Sarcosine                          | 13.745  | 0.000108 | 3.9668    | 0.00022027  |
| Taurodeoxycholic acid              | 12.547  | 0.000179 | 3.7464    | 0.00036085  |
| Methionine sulfoxide               | 12.03   | 0.000225 | 3.6469    | 0.00044273  |
| L-Alanine                          | 10.309  | 0.000509 | 3.2933    | 0.00097544  |
| Isoleucine                         | 9.4619  | 0.000784 | 3.1055    | 0.0014684   |
| Asymmetric dimethylarginine        | 9.1018  | 0.00095  | 3.0224    | 0.0017374   |
| Creatinine                         | 8.4919  | 0.001327 | 2.8772    | 0.0023474   |
| Deoxyribose 5-phosphate            | 7.3442  | 0.00259  | 2.5867    | 0.0042991   |
| Urea                               | 6.6404  | 0.004018 | 2.396     | 0.0065336   |
| Thiamine pyrophosphate             | 6.3928  | 0.004716 | 2.3265    | 0.0075169   |
| Phenylalanine                      | 6.0442  | 0.00594  | 2.2262    | 0.0091953   |
| N-Acetyl-L-alanine                 | 5.5168  | 0.00853  | 2.0691    | 0.012485    |

**Table S2. Differentially expressed metabolites (combination compared to control and single drug treatment)**

**Table S3. Pathway analysis of the differentially expressed metabolites (combination compared to control and single drug treatment)**

| Pathway Name                                | Match Status | p         | -log(p) | Holm p    | FDR       | Impact  |
|---------------------------------------------|--------------|-----------|---------|-----------|-----------|---------|
| Arginine biosynthesis                       | 6/14         | 6.179E-6  | 11.994  | 5.1903E-4 | 5.1903E-4 | 0.2335  |
| Aminoacyl-tRNA biosynthesis                 | 9/48         | 5.4517E-5 | 9.817   | 0.0045249 | 0.0016028 | 0.0     |
| Alanine, aspartate and glutamate metabolism | 7/28         | 5.7241E-5 | 9.7682  | 0.0046938 | 0.0016028 | 0.64263 |
| Nicotinate and nicotinamide metabolism      | 5/15         | 1.6391E-4 | 8.7162  | 0.013277  | 0.0034422 | 0.46053 |
| Purine metabolism                           | 9/65         | 6.1796E-4 | 7.3891  | 0.049437  | 0.010382  | 0.11537 |
| Glyoxylate and dicarboxylate metabolism     | 5/32         | 0.0066118 | 5.0189  | 0.52234   | 0.092566  | 0.12963 |
| Pyrimidine metabolism                       | 5/39         | 0.015354  | 4.1764  | 1.0       | 0.17398   | 0.09797 |
| Nitrogen metabolism                         | 2/6          | 0.019996  | 3.9122  | 1.0       | 0.17398   | 0.0     |
| D-Glutamine and D-glutamate metabolism      | 2/6          | 0.019996  | 3.9122  | 1.0       | 0.17398   | 0.5     |
| Glutathione metabolism                      | 4/28         | 0.020711  | 3.8771  | 1.0       | 0.17398   | 0.36615 |
| Thiamine metabolism                         | 2/7          | 0.027303  | 3.6007  | 1.0       | 0.2085    | 0.66667 |
| Glycine, serine and threonine metabolism    | 4/33         | 0.035851  | 3.3284  | 1.0       | 0.25096   | 0.3387  |
| Citrate cycle (TCA cycle)                   | 3/20         | 0.039332  | 3.2357  | 1.0       | 0.25414   | 0.1512  |

**Table S4. Combination index values for Figures 2A, 2B, 2D, and 2G**

|                  |                      | <b>Combination Index</b>           |                                   |                                  |                                   |
|------------------|----------------------|------------------------------------|-----------------------------------|----------------------------------|-----------------------------------|
| <b>Figure 2A</b> | <b>MOLM-13</b>       | <b>Gilt 12.5 nM + CUDC 12.5 nM</b> | <b>Gilt 25 nM + CUDC 12.5 nM</b>  | <b>Gilt 12.5 nM + CUDC 25 nM</b> | <b>Gilt 25 nM + CUDC 25 nM</b>    |
|                  |                      | <b>0.252</b>                       | <b>0.119</b>                      | <b>0.256</b>                     | <b>0.157</b>                      |
|                  | <b>MV4-11</b>        | <b>Gilt 12.5 nM + CUDC 12.5 nM</b> | <b>Gilt 25 nM + CUDC 12.5 nM</b>  | <b>Gilt 12.5 nM + CUDC 25 nM</b> | <b>Gilt 25 nM + CUDC 25 nM</b>    |
|                  |                      | <b>0.350</b>                       | <b>0.113</b>                      | <b>0.319</b>                     | <b>0.141</b>                      |
| <b>Figure 2B</b> | <b>MOLM-13</b>       | <b>CUDC 12.5 nM + Gilt 12.5 nM</b> | <b>Gilt 25 nM + CUDC 12.5 nM</b>  | <b>Gilt 12.5 nM + CUDC 25 nM</b> | <b>Gilt 25 nM + CUDC 25 nM</b>    |
|                  |                      | <b>0.212</b>                       | <b>0.116</b>                      | <b>0.113</b>                     | <b>0.096</b>                      |
|                  | <b>MV4-11</b>        | <b>CUDC 12.5 nM + Gilt 12.5 nM</b> | <b>Gilt 25 nM + CUDC 12.5 nM</b>  | <b>Gilt 12.5 nM + CUDC 25 nM</b> | <b>Gilt 25 nM + CUDC 25 nM</b>    |
|                  |                      | <b>0.240</b>                       | <b>0.346</b>                      | <b>0.330</b>                     | <b>0.519</b>                      |
| <b>Figure 2D</b> | <b>MV4-11/AraC-R</b> | <b>Gilt 12.5 nM + CUDC 12.5 nM</b> | <b>Gilt 25 nM + CUDC 12.5 nM</b>  | <b>Gilt 12.5 nM + CUDC 25 nM</b> | <b>Gilt 25 nM + CUDC 25 nM</b>    |
|                  |                      | <b>0.102</b>                       | <b>0.082</b>                      | <b>0.153</b>                     | <b>0.150</b>                      |
| <b>Figure 2G</b> | <b>THP-1</b>         | <b>Gilt 1000 nM + CUDC 50 nM</b>   | <b>Gilt 1000 nM + CUDC 100 nM</b> | <b>Gilt 2000 nM + CUDC 50 nM</b> | <b>Gilt 2000 nM + CUDC 100 nM</b> |
|                  |                      | <b>0.734</b>                       | <b>0.874</b>                      | <b>0.626</b>                     | <b>0.965</b>                      |
|                  | <b>OCI-AML3</b>      | <b>Gilt 1000 nM + CUDC 25 nM</b>   | <b>Gilt 1000 nM + CUDC 50 nM</b>  | <b>Gilt 2000 nM + CUDC 25 nM</b> | <b>Gilt 2000 nM + CUDC 50 nM</b>  |
|                  |                      | <b>0.419</b>                       | <b>0.149</b>                      | <b>0.267</b>                     | <b>0.050</b>                      |

**Table S5. Combination index values for Figure 3A**

|         | <b>Combination Index</b>    |                             |                             |                            |
|---------|-----------------------------|-----------------------------|-----------------------------|----------------------------|
| AML#180 | Gilt 1000 nM + CUDC 12.5 nM | Gilt 2000 nM + CUDC 12.5 nM | Gilt 1000 nM + CUDC 25 nM   | Gilt 2000 nM + CUDC 25 nM  |
|         | <b>0.323</b>                | <b>0.375</b>                | <b>0.564</b>                | <b>0.528</b>               |
| AML#207 | Gilt 1000 nM + CUDC 25 nM   | Gilt 1000 nM + CUDC 50 nM   | Gilt 2000 nM + CUDC 25 nM   | Gilt 2000 nM + CUDC 50 nM  |
|         | <b>0.009</b>                | <b>0.01</b>                 | <b>0.009</b>                | <b>0.005</b>               |
| AML#208 | Gilt 500 nM + CUDC 12.5 nM  | Gilt 500 nM + CUDC 25 nM    | Gilt 1000 nM + CUDC 12.5 nM | Gilt 1000 nM + CUDC 25 nM  |
|         | <b>0.022</b>                | <b>0.008</b>                | <b>0.041</b>                | <b>0.010</b>               |
| AML#212 | Gilt 2000 nM + CUDC 25 nM   | Gilt 2000 nM + CUDC 50 nM   | Gilt 4000 nM + CUDC 25 nM   | Gilt 4000 nM + CUDC 50 nM  |
|         | <b>0.219</b>                | <b>0.264</b>                | <b>0.186</b>                | <b>0.229</b>               |
| AML#213 | Gilt 2000 nM + CUDC 25 nM   | Gilt 2000 nM + CUDC 50 nM   | Gilt 4000 nM + CUDC 25 nM   | Gilt 4000 nM + CUDC 50 nM  |
|         | <b>0.372</b>                | <b>0.514</b>                | <b>0.292</b>                | <b>0.406</b>               |
| AML#214 | Gilt 1000 nM + CUDC 25 nM   | Gilt 1000 nM + CUDC 50 nM   | Gilt 2000 nM + CUDC 25 nM   | Gilt 2000 nM + CUDC 50 nM  |
|         | <b>0.207</b>                | <b>0.248</b>                | <b>0.204</b>                | <b>0.244</b>               |
| AML#257 | Gilt 1000 nM + CUDC 50 nM   | Gilt 1000 nM + CUDC 100 nM  | Gilt 2000 nM + CUDC 50 nM   | Gilt 2000 nM + CUDC 100 nM |
|         | <b>0.12</b>                 | <b>0.177</b>                | <b>0.036</b>                | <b>0.054</b>               |

**Table S6. Combination index values for Figure 3C**

|                | <b>Combination Index</b>         |                                   |                                  |                                   |
|----------------|----------------------------------|-----------------------------------|----------------------------------|-----------------------------------|
| <b>AML#170</b> | <b>Gilt 4000 nM + CUDC 50 nM</b> | <b>Gilt 4000 nM + CUDC 100 nM</b> | <b>Gilt 8000 nM + CUDC 50 nM</b> | <b>Gilt 8000 nM + CUDC 100 nM</b> |
|                | <b>0.176</b>                     | <b>0.236</b>                      | <b>0.104</b>                     | <b>0.324</b>                      |
| <b>AML#210</b> | <b>Gilt 2000 nM + CUDC 25 nM</b> | <b>Gilt 2000 nM + CUDC 50 nM</b>  | <b>Gilt 4000 nM + CUDC 25 nM</b> | <b>Gilt 4000 nM + CUDC 50 nM</b>  |
|                | <b>0.309</b>                     | <b>0.185</b>                      | <b>0.233</b>                     | <b>0.114</b>                      |
| <b>AML#216</b> | <b>Gilt 1000 nM + CUDC 25 nM</b> | <b>Gilt 1000 nM + CUDC 50 nM</b>  | <b>Gilt 2000 nM + CUDC 25 nM</b> | <b>Gilt 2000 nM + CUDC 50 nM</b>  |
|                | <b>3.847</b>                     | <b>1.996</b>                      | <b>2.189</b>                     | <b>0.834</b>                      |
| <b>AML#235</b> | <b>Gilt 1000 nM + CUDC 50 nM</b> | <b>Gilt 1000 nM + CUDC 100 nM</b> | <b>Gilt 2000 nM + CUDC 50 nM</b> | <b>Gilt 2000 nM + CUDC 100 nM</b> |
|                | <b>0.509</b>                     | <b>0.642</b>                      | <b>0.465</b>                     | <b>0.84</b>                       |
| <b>AML#254</b> | <b>Gilt 1000 nM + CUDC 50 nM</b> | <b>Gilt 1000 nM + CUDC 100 nM</b> | <b>Gilt 2000 nM + CUDC 50 nM</b> | <b>Gilt 2000 nM + CUDC 100 nM</b> |
|                | <b>0.683</b>                     | <b>0.95</b>                       | <b>0.742</b>                     | <b>1.038</b>                      |
| <b>AML#256</b> | <b>Gilt 1000 nM + CUDC 50 nM</b> | <b>Gilt 1000 nM + CUDC 100 nM</b> | <b>Gilt 2000 nM + CUDC 50 nM</b> | <b>Gilt 2000 nM + CUDC 100 nM</b> |
|                | <b>0.787</b>                     | <b>1.441</b>                      | <b>0.889</b>                     | <b>1.698</b>                      |
